# Supplementary material
Source: publisher figshare collection journal article supplement (https://frontiersin.figshare.com/ndownloader/files/15564461)
Supplement: Supplementary file [file 15564461]

# Leaf symptoms

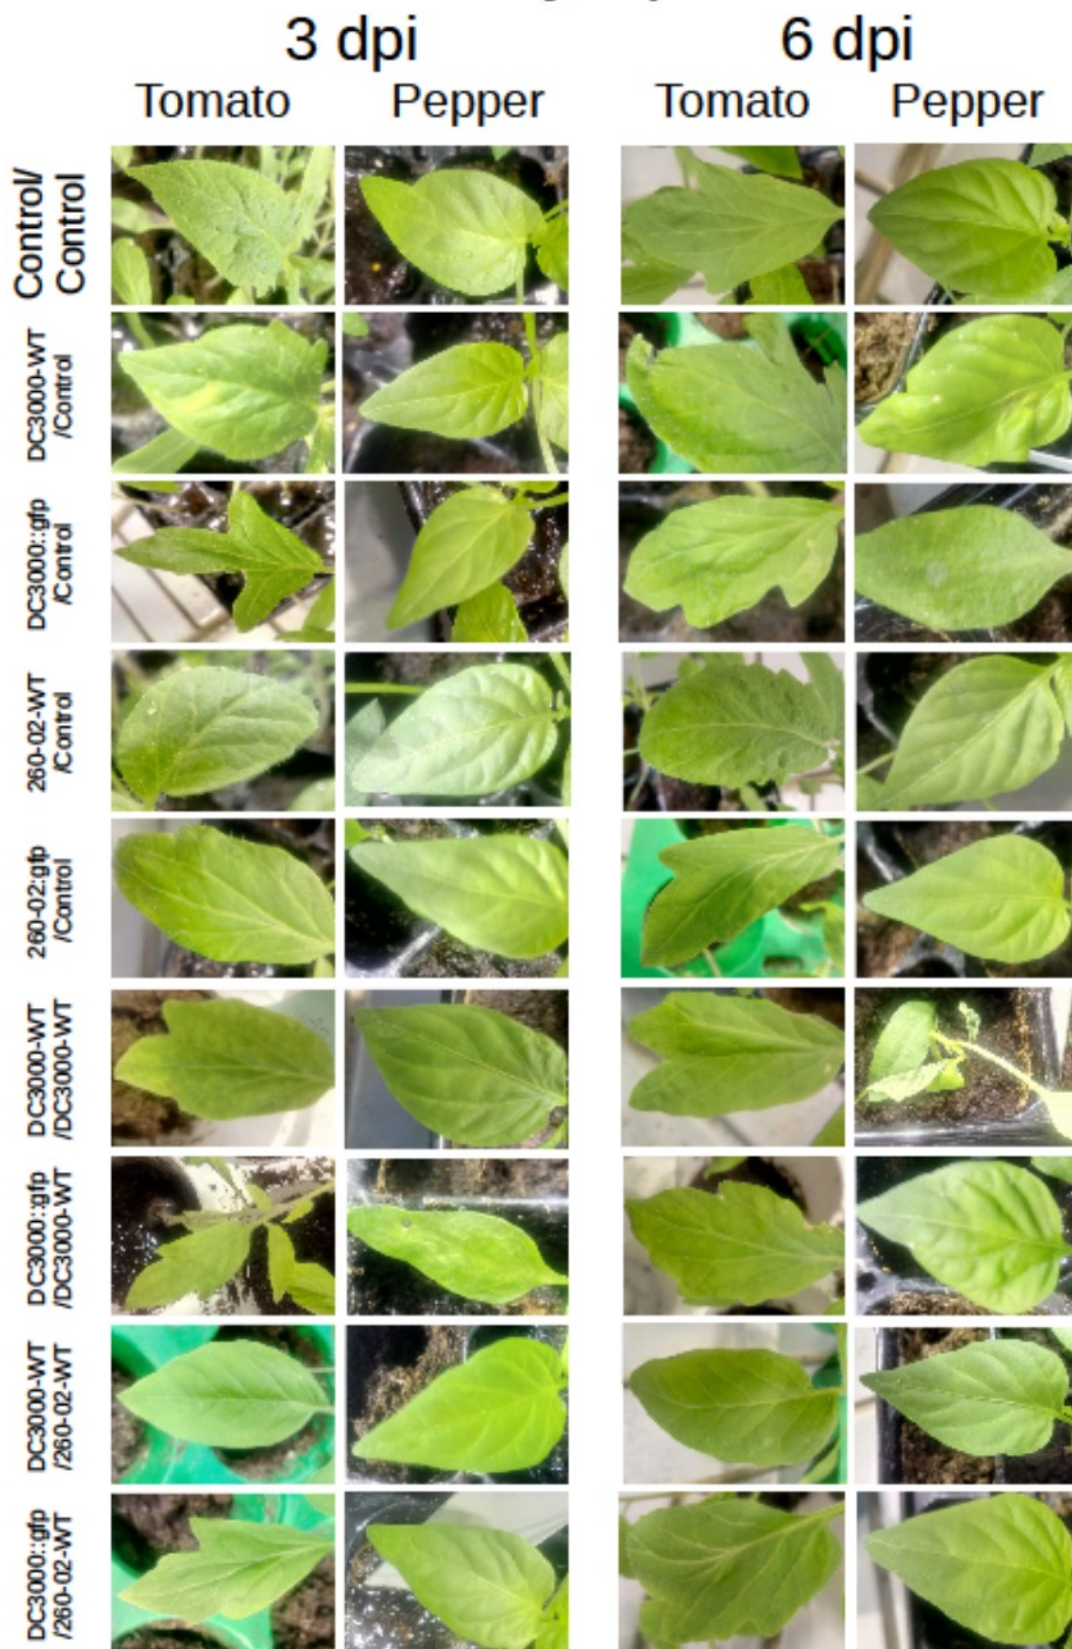

Supplementary Figure S1: pictures of leaves of pepper and tomato plants 3 and 6 days post inoculation. Each column represents one host at one time point, from left to right: tomato 3 dpi, pepper 3 dpi, tomato 6 dpi, pepper 6 dpi. Each row represents a different treatment, indicated on the Y-axis. The first line of the label indicates the leaf treatment (Control, 260-02 or DC3000, either wild type or mutants expressing GFP), while the second line of the label indicates the root treatment (Control, 260-02 or DC3000 wild-type).
